# Supplementary material
Source: MDPI journal article supplement (https://www.mdpi.com/search?q=processes-08-01550)
Supplement: s001 [file processes-08-01550-s001.pdf]

## Supplementary File

**Figure S1.** MALDI-TOF mass spectrum of **D-Aib1**.

**Figure S2.** MALDI-TOF mass spectrum of **D-Aib2**.

**Figure S3.** MALDI-TOF mass spectrum of **D-Aib3**.

**Figure S4.** MALDI-TOF mass spectrum of **D-Aib4**.

**Figure S5.** MALDI-TOF mass spectrum of **D-Aib5**.

**Figure S6.** MALDI-TOF mass spectrum of **L-Aib1**.

**Figure S7.** MALDI-TOF mass spectrum of **L-Aib2**.

**Figure S8.** MALDI-TOF mass spectrum of **L-Aib3**.

**Figure S9.** MALDI-TOF mass spectrum of **L-Aib4**.

**Figure S10.** MALDI-TOF mass spectrum of **L-Aib5**.

**Figure S11.** RP-HPLC chart of **D-Aib1**.

**Figure S12.** RP-HPLC chart of **D-Aib2**.

**Figure S13.** RP-HPLC chart of **D-Aib3**.

**Figure S14.** RP-HPLC chart of **D-Aib4**.

**Figure S15.** RP-HPLC chart of **D-Aib5**.

**Figure S16.** RP-HPLC chart of **L-Aib1**.

**Figure S17.** RP-HPLC chart of **L-Aib2**.

**Figure S18.** RP-HPLC chart of **L-Aib3**.

**Figure S19.** RP-HPLC chart of **L-Aib4**.

**Figure S20.** RP-HPLC chart of **L-Aib5**.

**Figure S21.** CPL and PL spectra of **Aib1–5** in ethanol.

**Figure S22.** CPL and PL spectra of **1–3** in ethanol.

**Figure S23.** CD and UV–Vis spectra of **Aib1–5** in ethanol.

**Figure S24.** CD and UV–Vis spectra of **1–3** in ethanol.

**Figure S25.** CPL and PL spectra of **Gly1**, **Gly3**, and **Gly5** in ethanol.

**Figure S26.** CD and UV–Vis spectra of **Gly1**, **Gly3**, and **Gly5** in ethanol.

**Table S1.** CPL, PL, CD, and UV–Vis properties of peptide–pyrene  
luminophores in ethanol

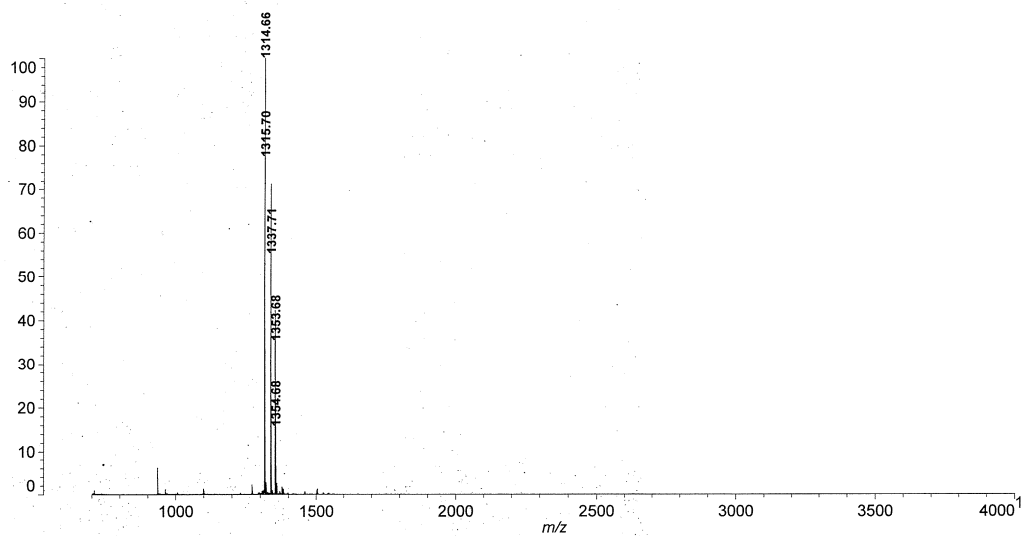

Figure S1. MALDI-TOF mass spectra of **D-Aib1**. An  $\alpha$ -CHCA was used as a matrix. **D-Aib1**; calcd.  $[M+H]^+ = 1315.67$ , obsd.  $[M+H]^+ = 1314.66$ .

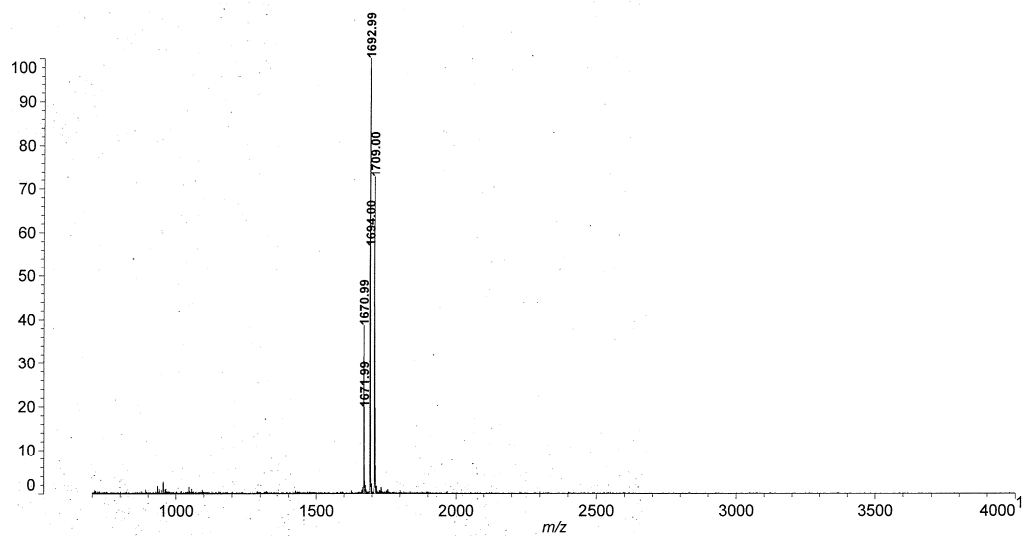

Figure S2. MALDI-TOF mass spectra of **D-Aib2**. An  $\alpha$ -CHCA was used as a matrix. **D-Aib2**; calcd.  $[M+H]^+ = 1671.82$ , obsd.  $[M+H]^+ = 1670.99$ .

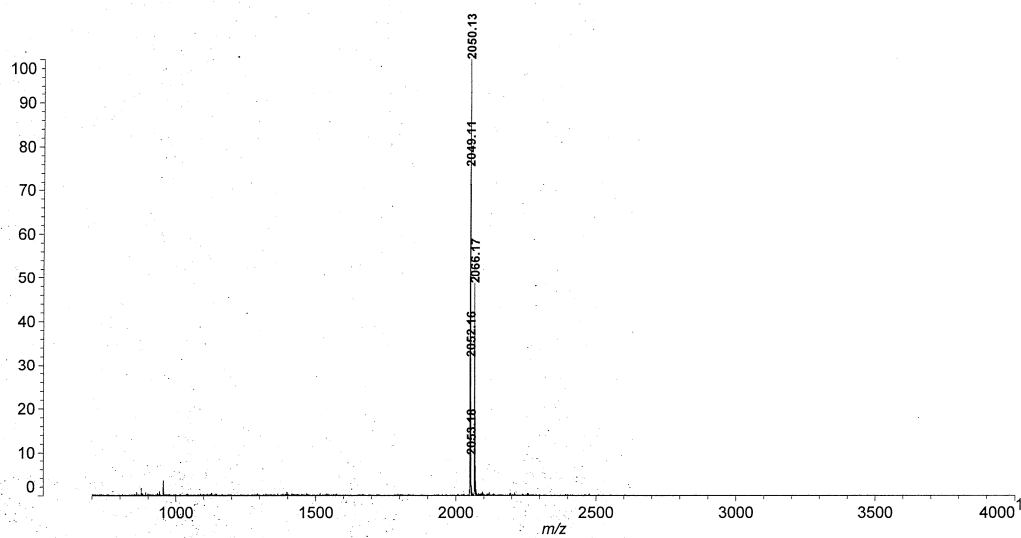

Figure S3. MALDI-TOF mass spectra of **D-Aib3**. An  $\alpha$ -CHCA was used as a matrix. **D-Aib3**; calcd.  $[M+Na]^+ = 2049.97$ , obsd.  $[M+Na]^+ = 2050.13$ .

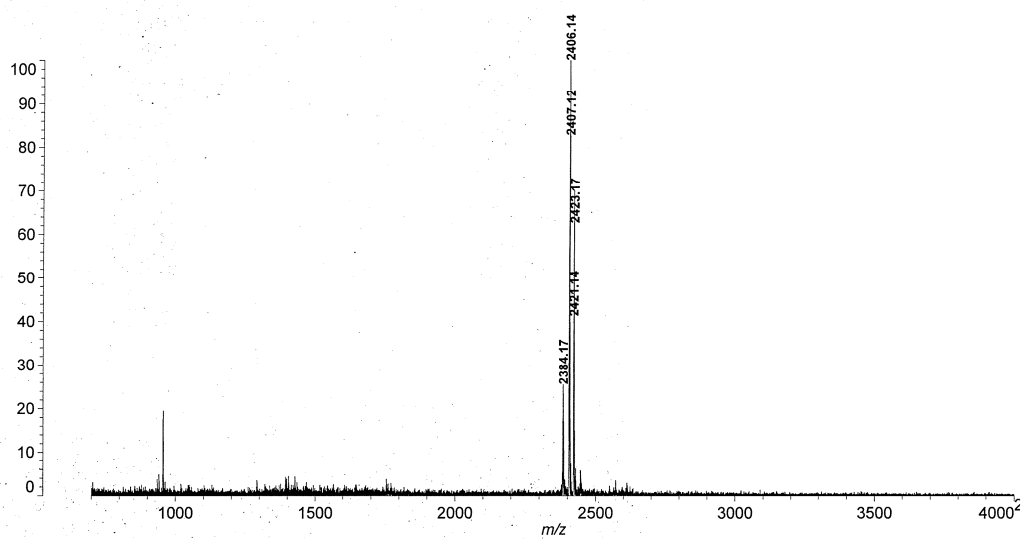

Figure S4. MALDI-TOF mass spectra of **D-Aib4**. An  $\alpha$ -CHCA was used as a matrix. **D-Aib4**; calcd.  $[M+Na]^+ = 2406.12$ , obsd.  $[M+Na]^+ = 2406.14$ .

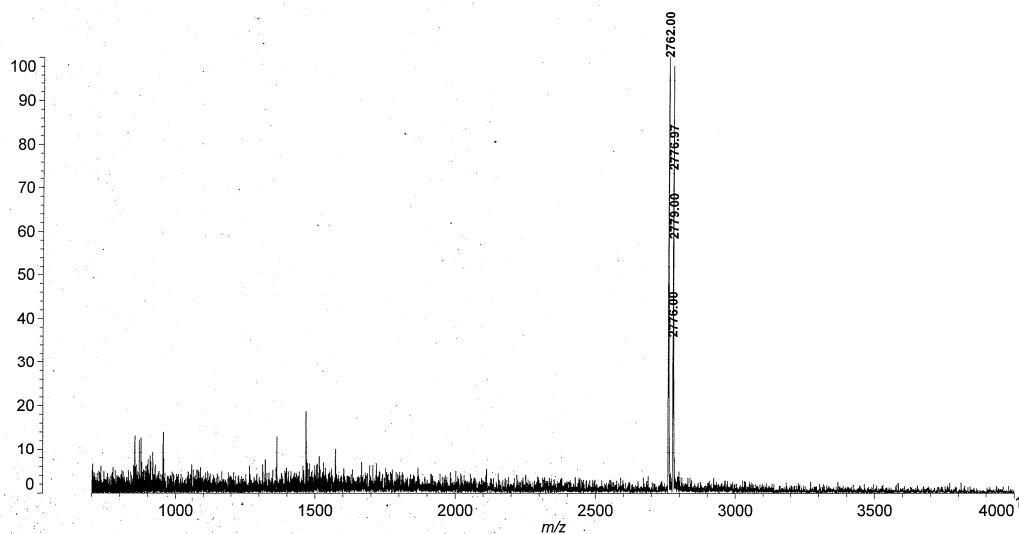

Figure S5. MALDI-TOF mass spectra of **D-Aib5**. An  $\alpha$ -CHCA was used as a matrix. **D-Aib5**; calcd.  $[M+Na]^+ = 2762.28$ , obsd.  $[M+Na]^+ = 2762.00$ .

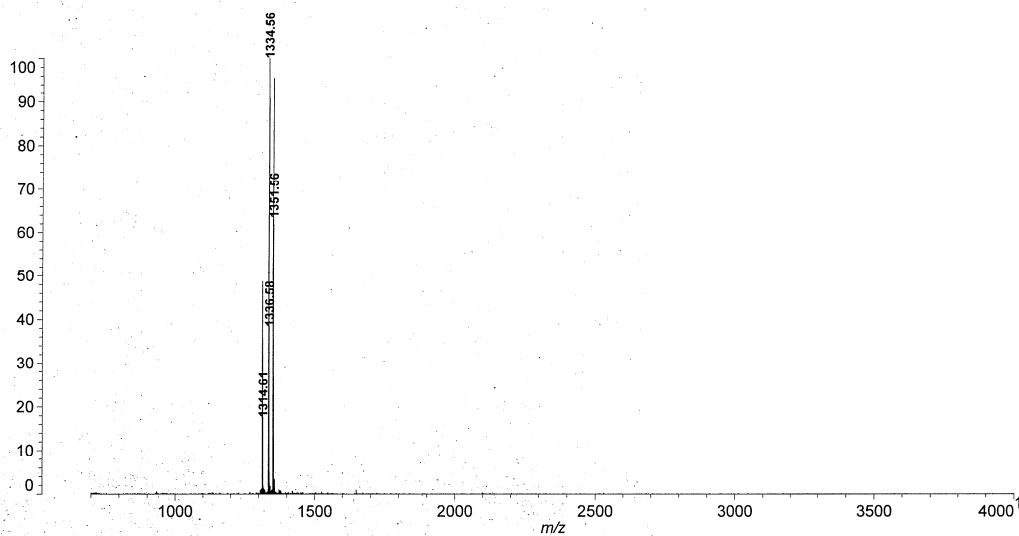

Figure S6. MALDI-TOF mass spectra of **L-Aib1**. An  $\alpha$ -CHCA was used as a matrix. **L-Aib1**; calcd.  $[M+H]^+ = 1315.67$ , obsd.  $[M+H]^+ = 1314.61$ .

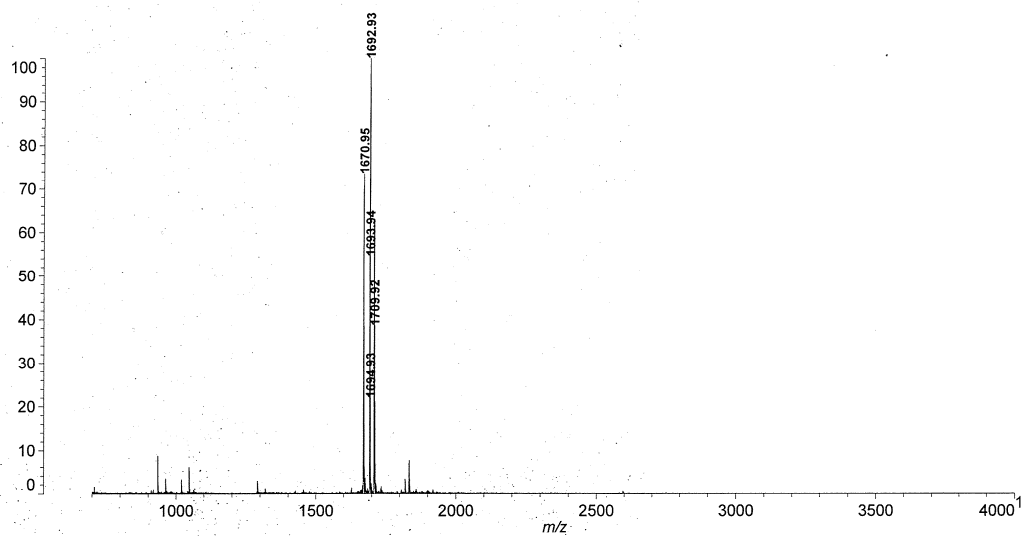

Figure S7. MALDI-TOF mass spectra of **L-Aib2**. An  $\alpha$ -CHCA was used as a matrix. **L-Aib2**; calcd.  $[M+H]^+ = 1671.82$ , obsd.  $[M+H]^+ = 1670.95$ .

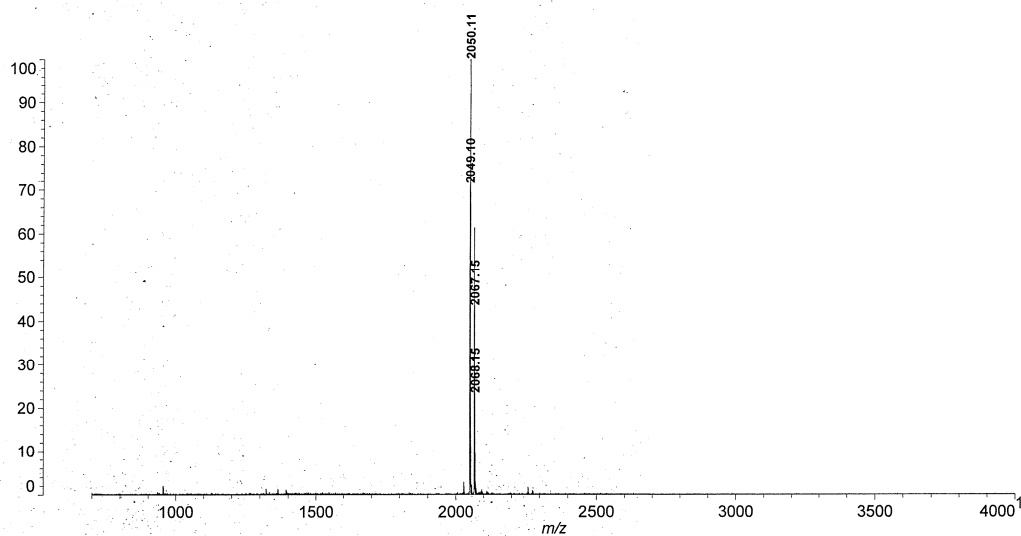

Figure S8. MALDI-TOF mass spectra of **L-Aib3**. An  $\alpha$ -CHCA was used as a matrix. **L-Aib3**; calcd.  $[M+Na]^+ = 2050.97$ , obsd.  $[M+Na]^+ = 2050.11$ .

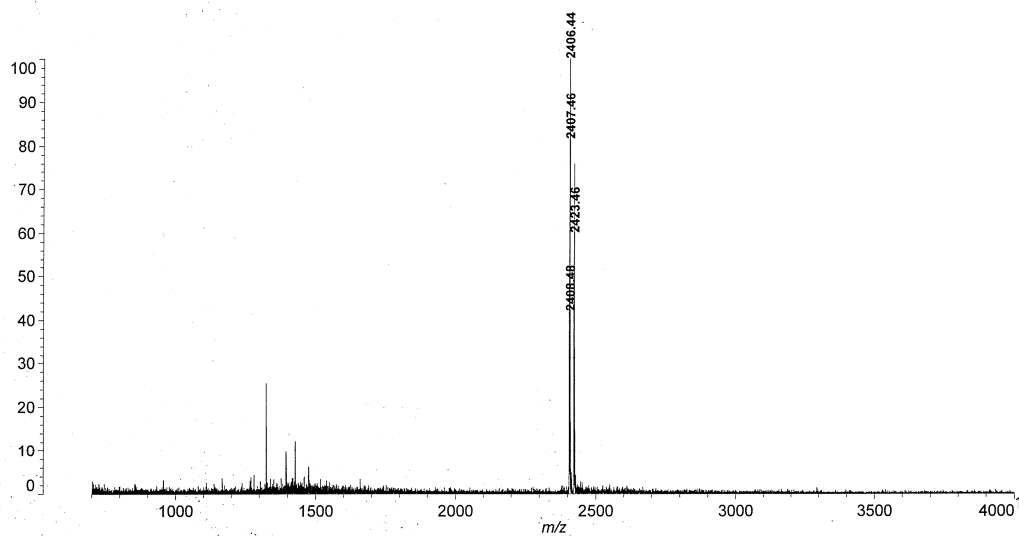

Figure S9. MALDI-TOF mass spectra of **L-Aib4**. An  $\alpha$ -CHCA was used as a matrix. **L-Aib4**; calcd.  $[M+Na]^+ = 2406.12$ , obsd.  $[M+Na]^+ = 2406.44$ .

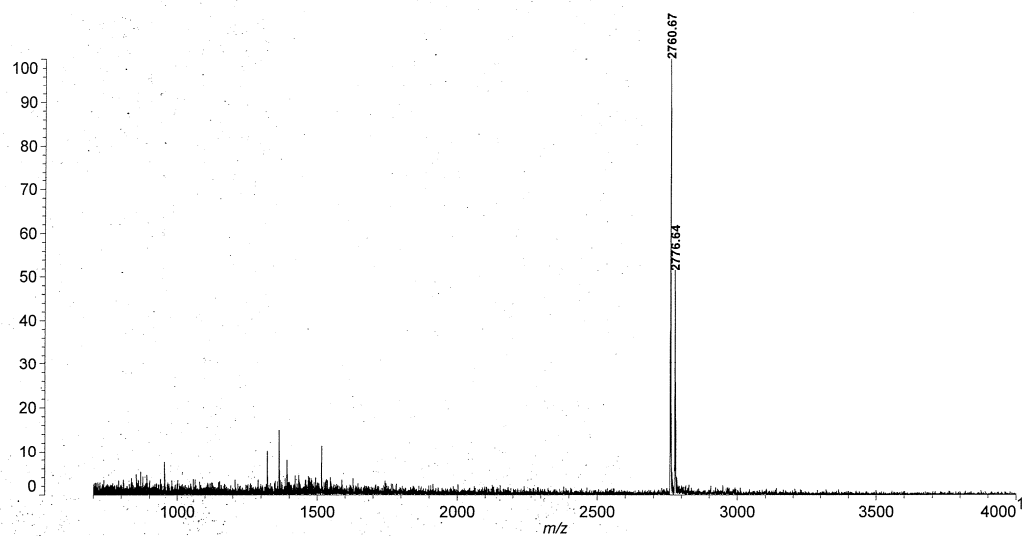

Figure S10. MALDI-TOF mass spectra of **L-Aib5**. An  $\alpha$ -CHCA was used as a matrix. **L-Aib5**; calcd.  $[M+Na]^+ = 2762.28$ , obsd.  $[M+Na]^+ = 2760.67$ .

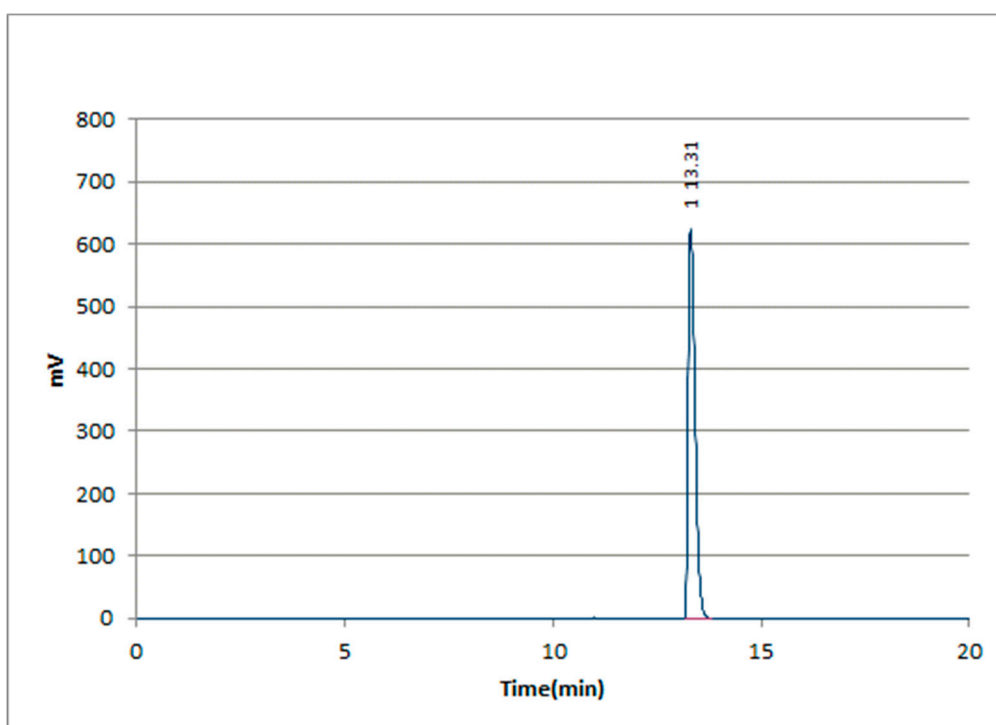

Figure S11. RP-HPLC chart of **D-Aib1**. Buffer A, 0.1% TFA in water; buffer B, acetonitrile, and monitoring at 340 nm with a gradient of 20-100% for 20 min.

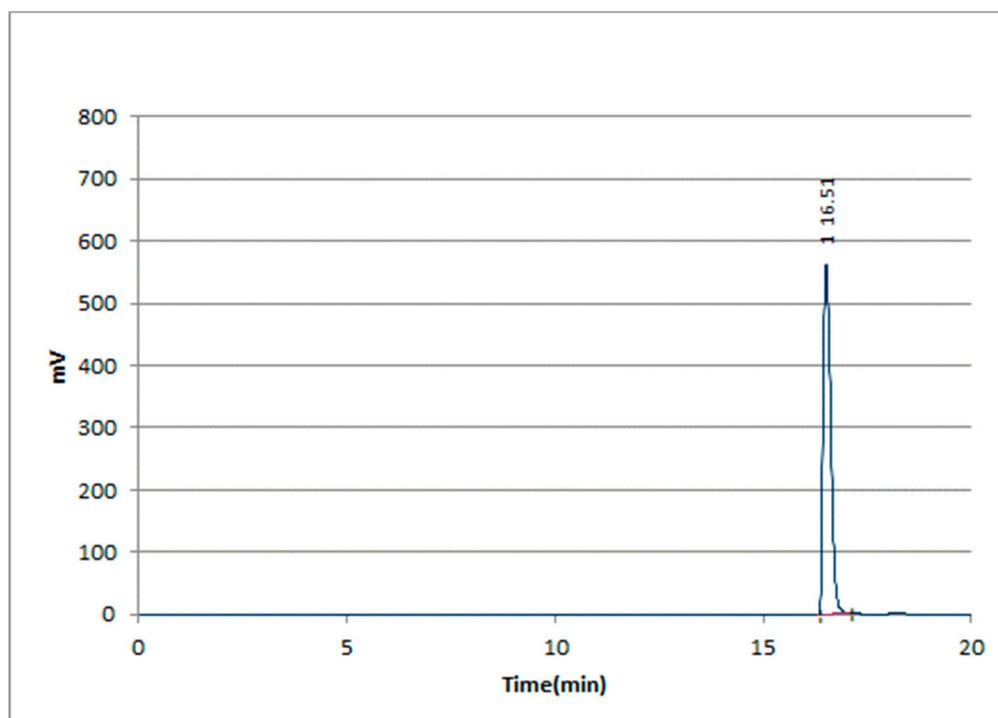

Figure S12. RP-HPLC chart of **D-Aib2**. Buffer A, 0.1% TFA in water; buffer B, acetonitrile, and monitoring at 340 nm with a gradient of 20-100% for 20 min.

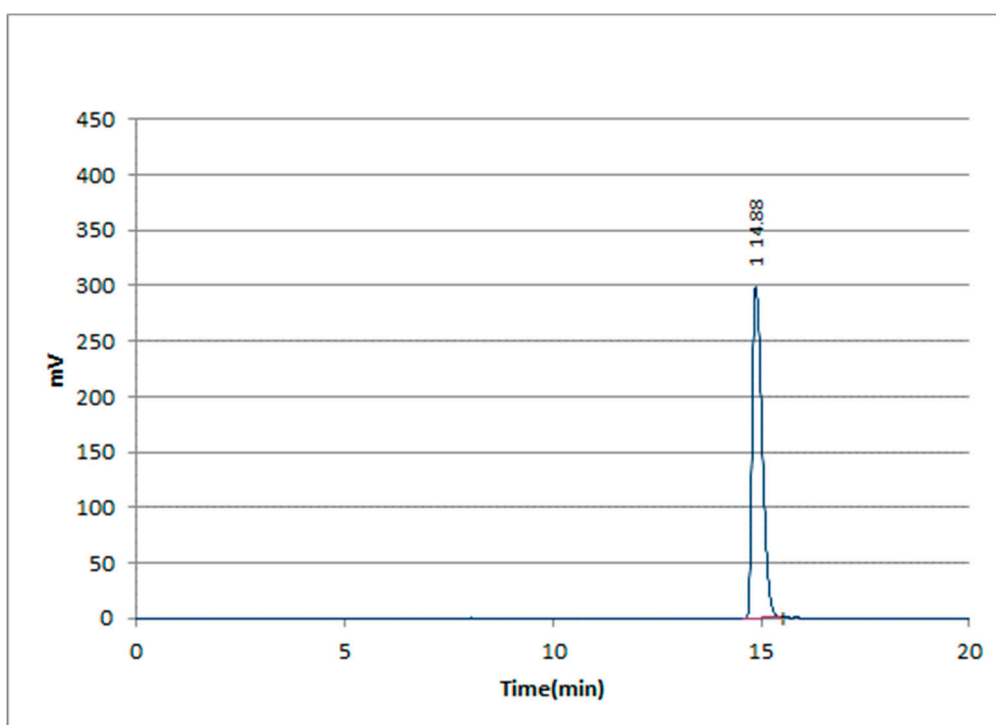

Figure S13. RP-HPLC chart of **D-Aib3**. Buffer A, 0.1% TFA in water; buffer B, acetonitrile, and monitoring at 340 nm with a gradient of 50-100% for 20 min.

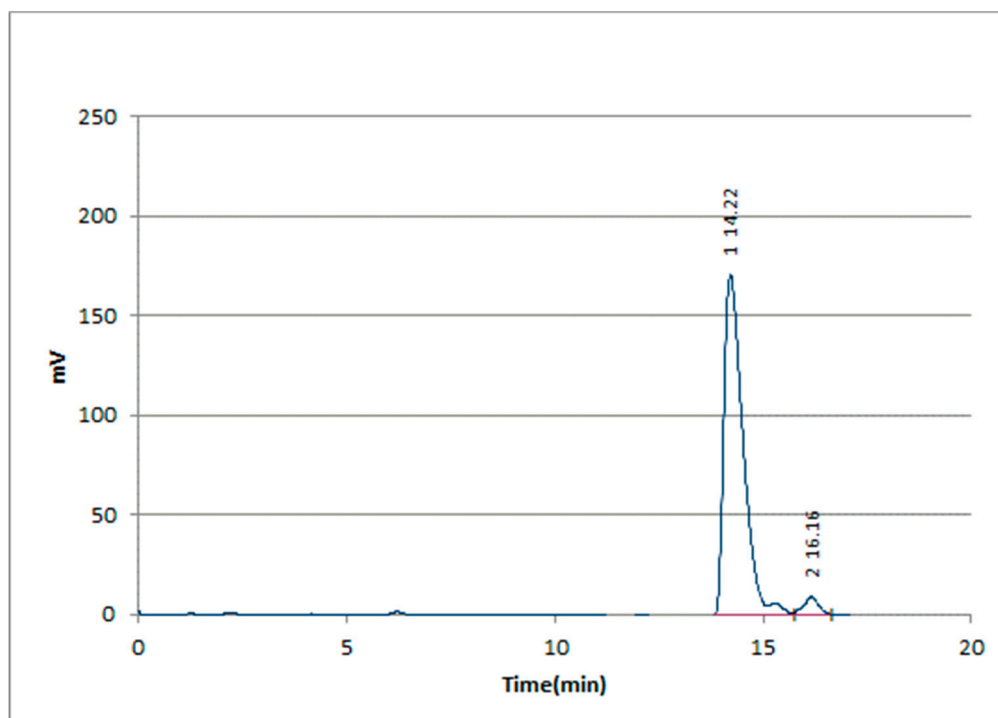

Figure S14. RP-HPLC chart of **D-Aib4**. Buffer A, 0.1% TFA in water; buffer B, acetonitrile, and monitoring at 340 nm with a gradient of 70-100% for 20 min.



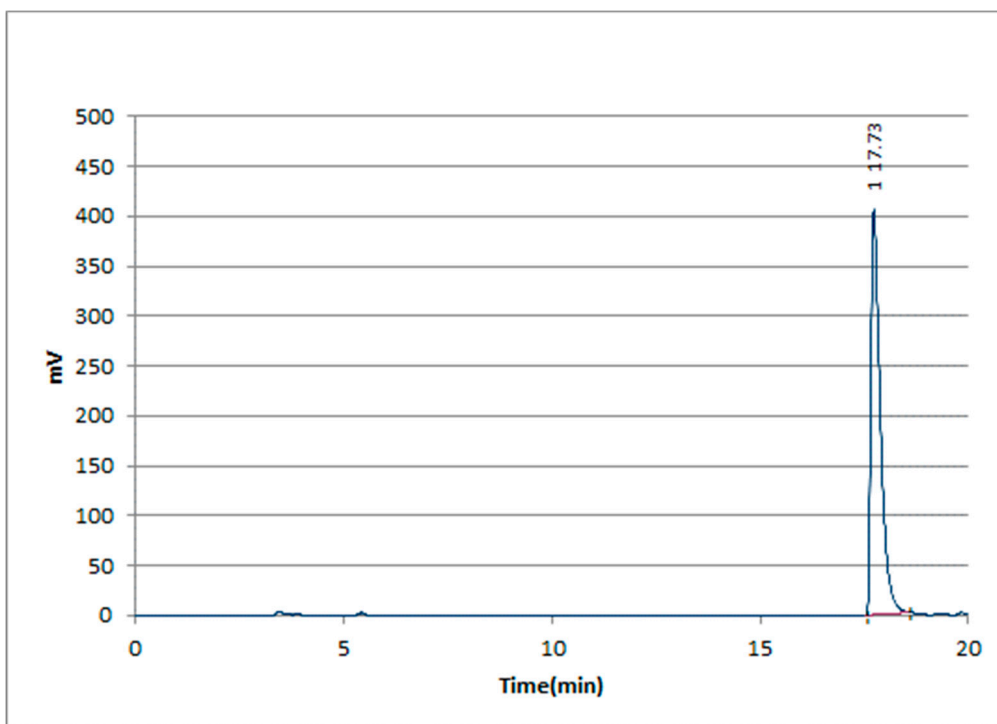

Figure S15. RP-HPLC chart of **D-Aib5**. Buffer A, 0.1% TFA in water; buffer B, acetonitrile, and monitoring at 340 nm with a gradient of 80-100% for 20 min.

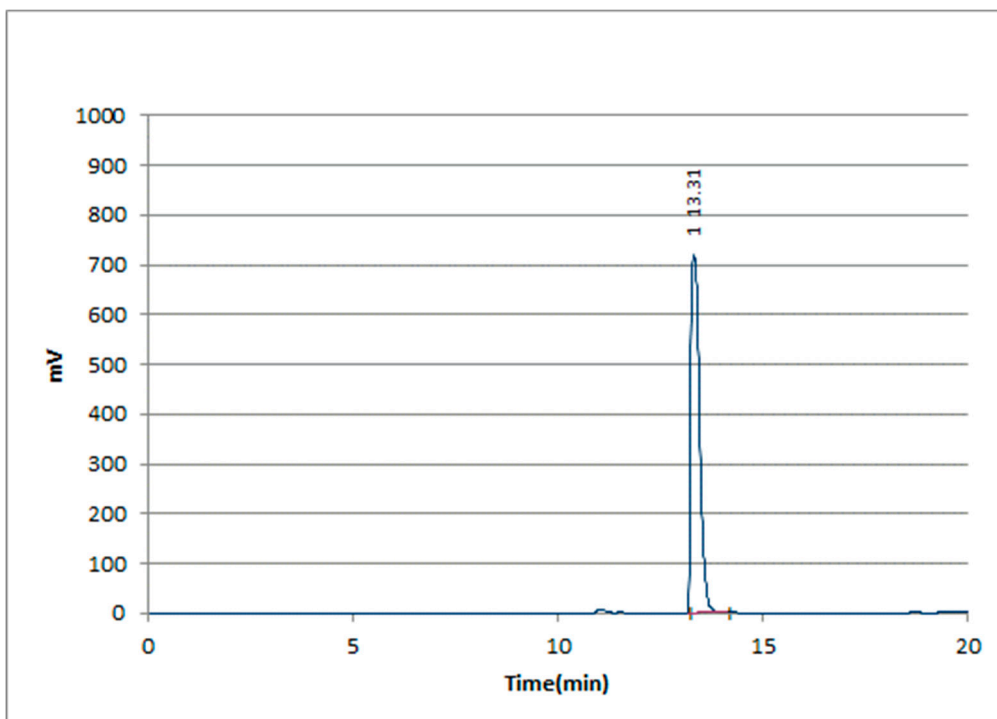

Figure S16. RP-HPLC chart of **L-Aib1**. Buffer A, 0.1% TFA in water; buffer B, acetonitrile, and monitoring at 340 nm with a gradient of 20-100% for 20 min.

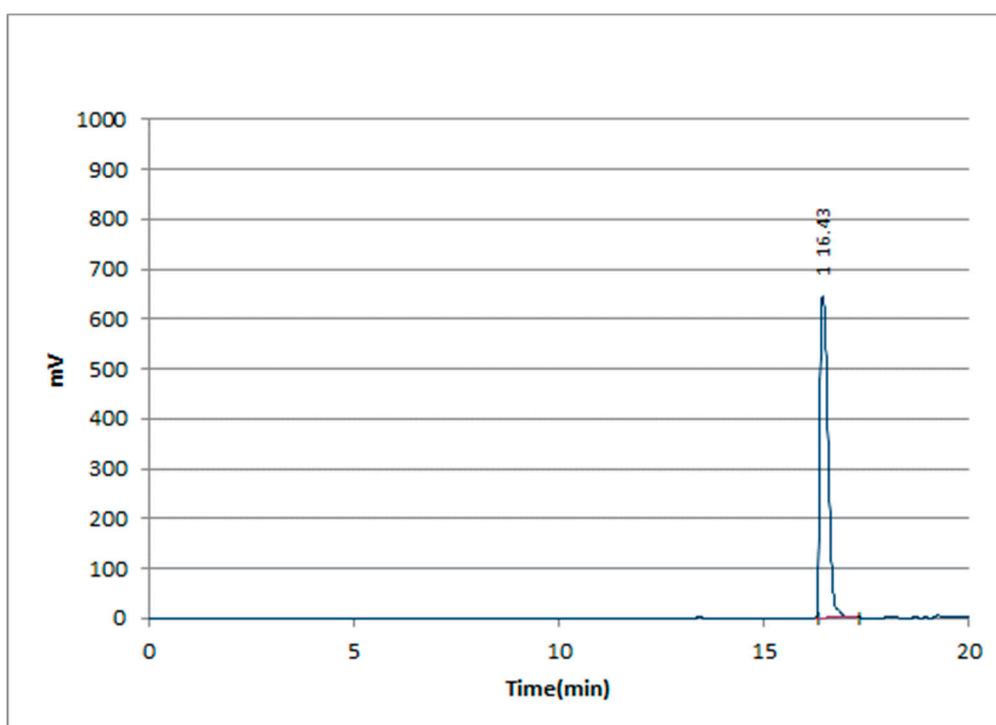

Figure S17. RP-HPLC chart of **L-Aib2**. Buffer A, 0.1% TFA in water; buffer B, acetonitrile, and monitoring at 340 nm with a gradient of 20-100% for 20 min.

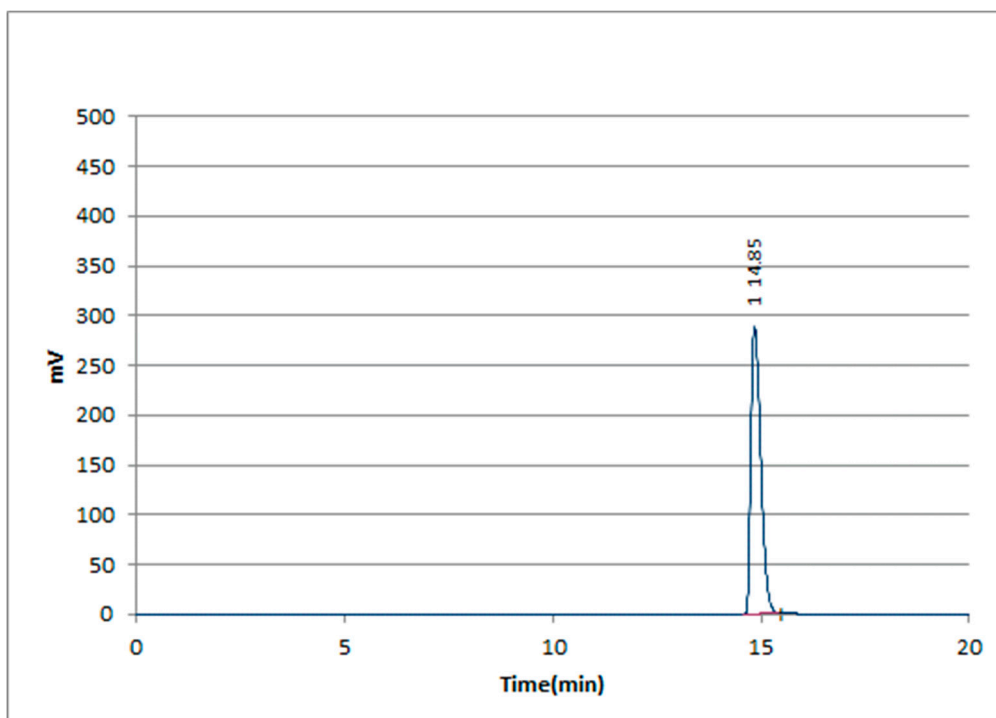

Figure S18. RP-HPLC chart of **L-Aib3**. Buffer A, 0.1% TFA in water; buffer B, acetonitrile, and monitoring at 340 nm with a gradient of 50-100% for 20 min.

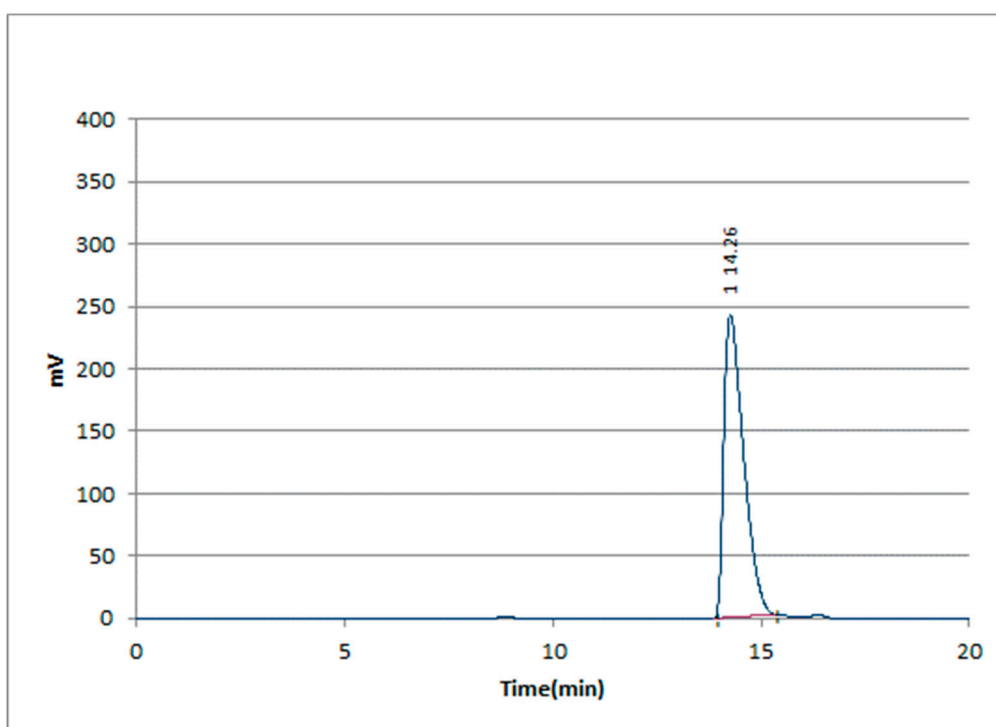

Figure S19. RP-HPLC chart of **L-Aib4**. Buffer A, 0.1% TFA in water; buffer B, acetonitrile, and monitoring at 340 nm with a gradient of 70-100% for 20 min.

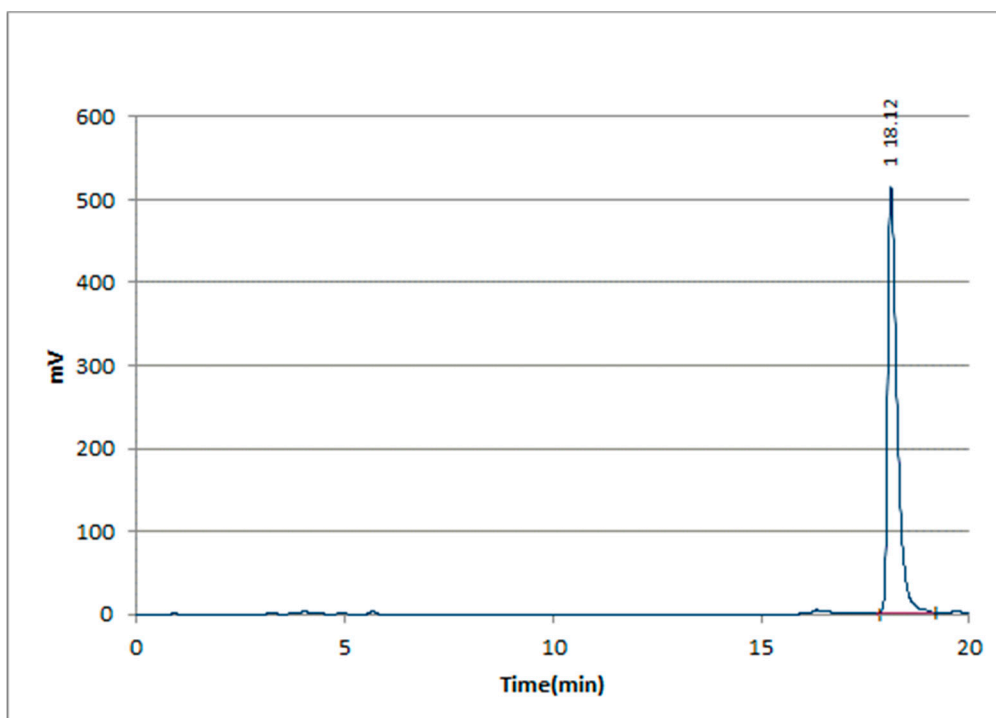

Figure S20. RP-HPLC chart of **L-Aib5**. Buffer A, 0.1% TFA in water; buffer B, acetonitrile, and monitoring at 340 nm with a gradient of 80-100% for 20 min.

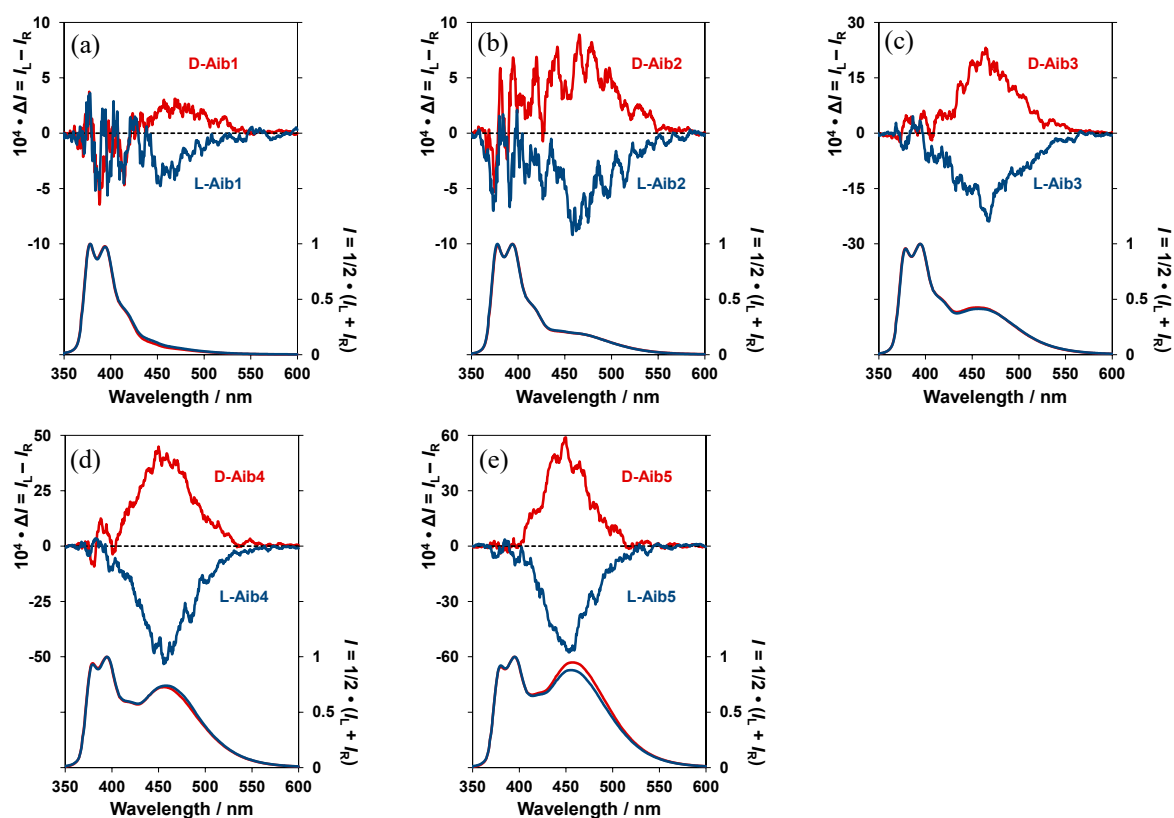

Figure S21. CPL (upper panel) and PL (lower panel) spectra of (a) D-Aib1/L-Aib1; (b) D-Aib2/L-Aib2; (c) D-Aib3/L-Aib3; (d) D-Aib4/L-Aib4; and (e) D-Aib5/L-Aib5 in ethanol ( $1.0 \times 10^{-4}$  M).  $\lambda_{\text{ex}} = 300$  nm D-isomer and L-isomer spectra are shown in red and blue, respectively. Path length = 2 mm.

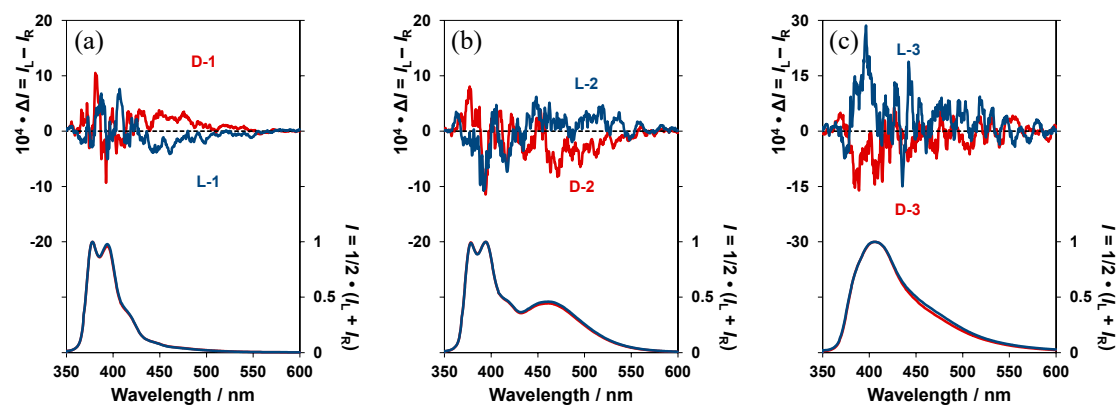

Figure S22. CPL (upper panel) and PL (lower panel) spectra of (a) D-1 / L-1; (b) D-2 / L-2; and (c) D-3 / L-3 in ethanol ( $1.0 \times 10^{-4}$  M).  $\lambda_{\text{ex}} = 300$  nm D-isomer and L-isomer spectra are shown in red and blue, respectively. Path length = 2 mm.

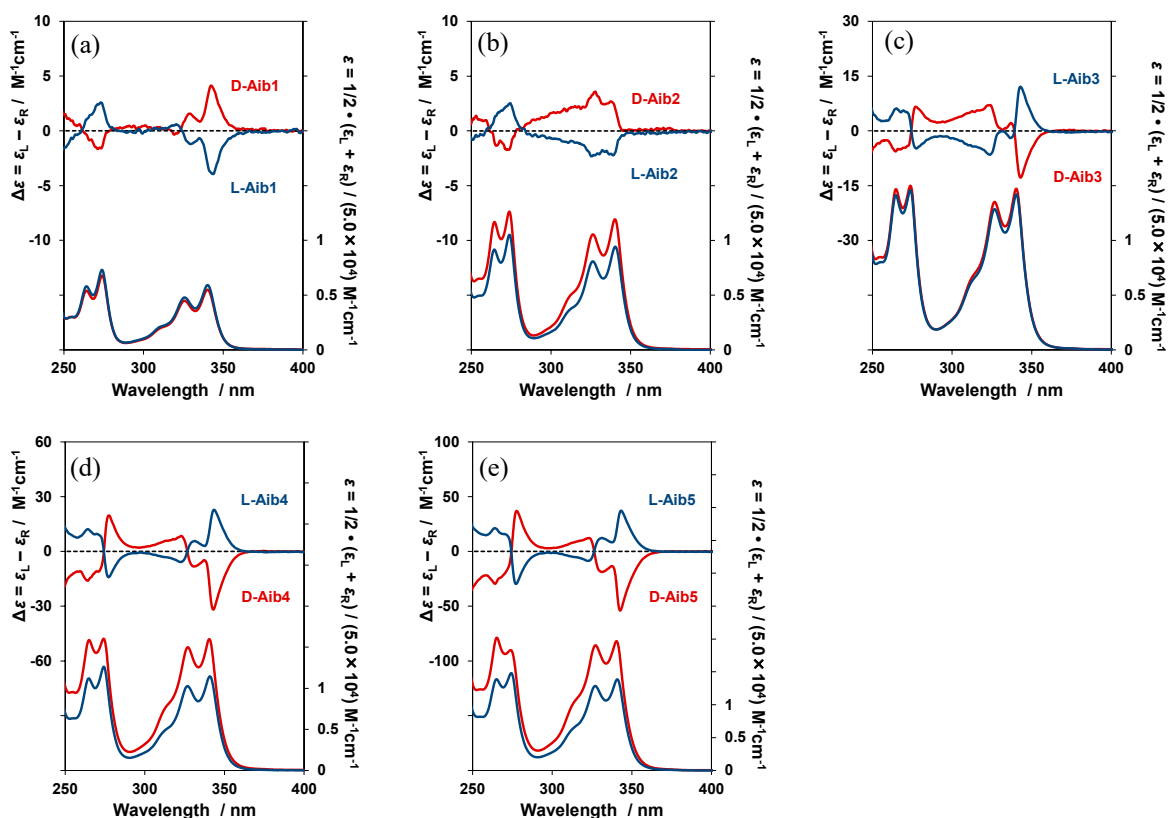

Figure S23. CD (upper panel) and UV-Vis (lower panel) spectra of (a) D-Aib1/L-Aib1; (b) D-Aib2/L-Aib2; (c) D-Aib3/L-Aib3; (d) D-Aib4/L-Aib4; and (e) D-Aib5/L-Aib5 in ethanol ( $1.0 \times 10^{-4}$  M). D-isomer and L-isomer spectra are shown in red and blue, respectively. Path length = 2 mm.

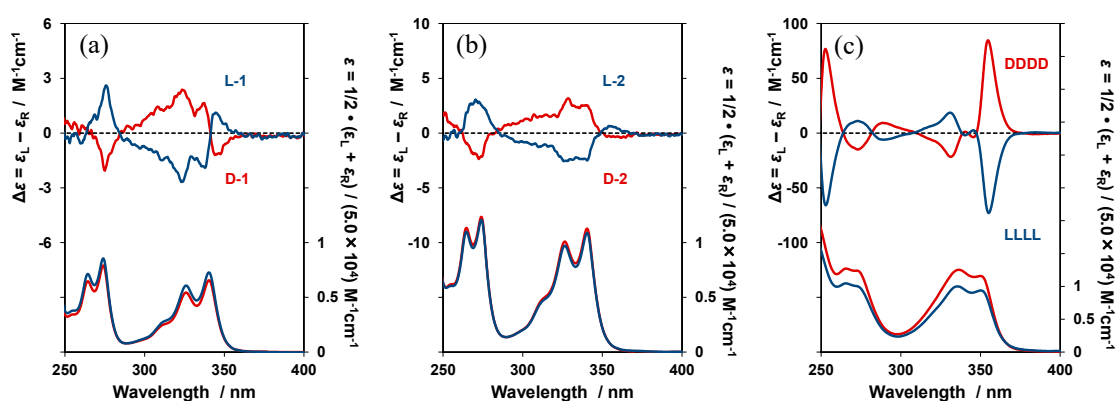

Figure S24. CD (upper panel) and UV-Vis (lower panel) spectra of (a) D-1 / L-1; (b) D-2 / L-2; and (c) D-3 / L-3 in ethanol ( $1.0 \times 10^{-4}$  M). D-isomer and L-isomer spectra are shown in red and blue, respectively. Path length = 2 mm.

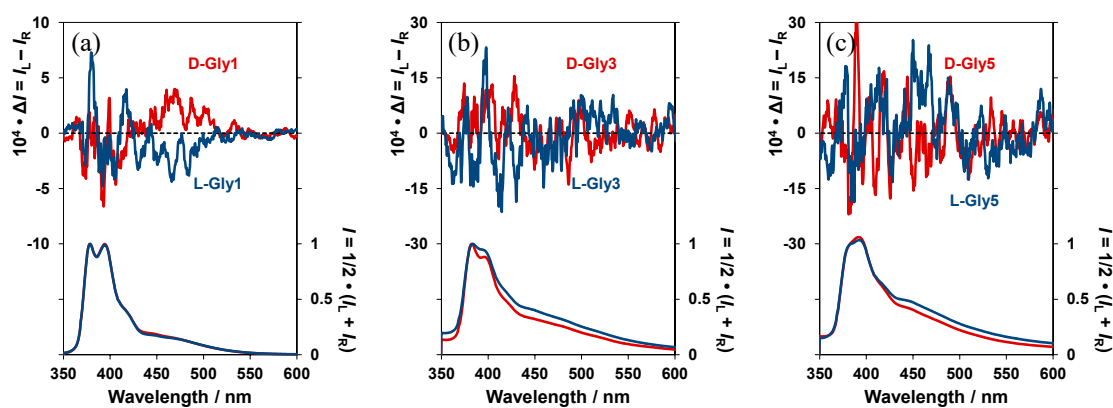

Figure S25. CPL (upper panel) and PL (lower panel) spectra of (a) D-Gly1/L-Gly1; (b) D-Gly3/L-Gly3; (c) D-Gly5/L-Gly5 in ethanol ( $1.0 \times 10^{-4}$  M).  $\lambda_{\text{ex}} = 300$  nm. D-isomer and L-isomer spectra are shown in red and blue, respectively. Path length = 1 mm.

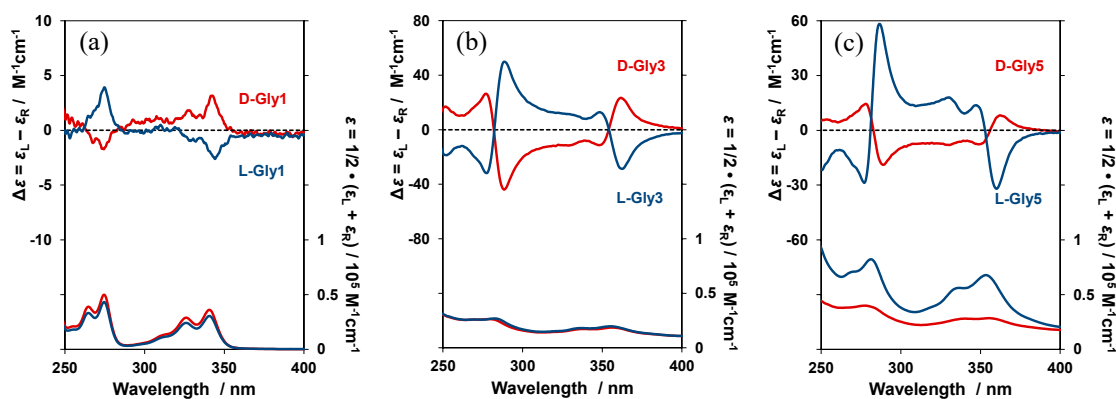

Figure S26. CD (upper panel) and UV-Vis (lower panel) spectra of (a) D-Gly1/L-Gly1; (b) D-Gly3/L-Gly3; (c) D-Gly5/L-Gly5 in ethanol ( $1.0 \times 10^{-4}$  M). D-isomer and L-isomer spectra are shown in red and blue, respectively. Path length = 1 mm.

**Table S1.** CPL, PL, CD, and UV-Vis properties of peptide-pyrene luminophores in ethanol.

| Name   | Monomer<br>PL (nm) | Excimer<br>PL (nm) | $\Phi_F$ | $g_{CPL}$<br>( $\times 10^{-3}$ ) | $\lambda_{CD}$<br>(nm) | $g_{CD}$<br>( $\times 10^{-4}$ ) | Note       |
|--------|--------------------|--------------------|----------|-----------------------------------|------------------------|----------------------------------|------------|
| D-Aib1 | 378                | 468.5              | 0.06     | +5.7                              | 343                    | +1.7                             |            |
| L-Aib1 | 378                | 453.5              |          | -5.0                              |                        | -1.9                             |            |
| D-Aib2 | 394                | 465.5              | 0.10     | +4.7                              | 338                    | +0.51                            |            |
| L-Aib2 | 378                | 458.5              |          | -4.7                              |                        | -4.9                             |            |
| D-Aib3 | 394                | 456.5              | 0.13     | +5.5                              | 343                    | -2.2                             |            |
| L-Aib3 | 394.5              | 457                |          | -6.0                              |                        | +2.1                             |            |
| D-Aib4 | 394                | 456.5              | 0.16     | +6.3                              | 343                    | -4.8                             |            |
| L-Aib4 | 395                | 458.5              |          | -7.2                              |                        | +4.8                             |            |
| D-Aib5 | 395                | 456.5              | 0.18     | +2.3                              | 343                    | -6.2                             |            |
| L-Aib5 | 395                | 456.5              |          | -2.9                              |                        | +6.1                             |            |
| D-Gly1 | 379                | 469                | 0.09     | +2.7                              | 341                    | +0.95                            |            |
| L-Gly1 | 379                | 466                |          | -2.9                              |                        | -1.1                             |            |
| D-Gly3 | ND                 | ND                 | 0.05     | ND                                | 362                    | +13                              | Aggregated |
| L-Gly3 | ND                 | ND                 |          | ND                                |                        | -16                              | Aggregated |
| D-Gly5 | ND                 | ND                 | 0.9      | ND                                | 361                    | +3.1                             | Aggregated |
| L-Gly5 | ND                 | ND                 |          | ND                                |                        | -5.5                             | Aggregated |
| D-1    | 378                | 479                | 0.06     | +7.3                              | 348                    | -1.2                             |            |
| L-1    | 378                | 462.5              |          | -7.8                              |                        | +0.48                            |            |
| D-2    | 394                | 461.5              | 0.13     | ND                                | 361                    | -6.4                             |            |
| L-2    | 394                | 462                |          | ND                                |                        | +2.3                             |            |
| D-3    | 406.5              | ND                 | 0.10     | ND                                | 355                    | +18                              | Aggregated |
| L-3    | 406                | ND                 |          | ND                                |                        | -19                              | Aggregated |
